# Supplementary material for: Genomic Methylated Cytosine Level during the Dedifferentiation and Cellular Competence in Coffea arabica Lines: Insights about the Different In Vitro Responses
Source: MDPI journal article supplement (doi:10.3390/f12111536), 2021-11-08
Supplement: s1 [file s1]

**Supplement 1** – Tissue culture medium used for ISE establishment from leaf explants of *C. arabica* 'Catuaí Vermelho', 'Caturra' and 'Oeiras'.

| Compounds                                 | Culture medium         |                        |                       |
|-------------------------------------------|------------------------|------------------------|-----------------------|
|                                           | M1                     | M2                     | M3                    |
| MS (Sigma <sup>®</sup> )                  | 2.15 g L <sup>-1</sup> | 4.3 g L <sup>-1</sup>  | 4.3 g L <sup>-1</sup> |
| Gamborg's B5 vitamins                     | 10 mL L <sup>-1</sup>  | 10 mL L <sup>-1</sup>  | 10 mL L <sup>-1</sup> |
| Sucrose (Sigma <sup>®</sup> )             | 30 g L <sup>-1</sup>   | 30 g L <sup>-1</sup>   | 30 g L <sup>-1</sup>  |
| L-cysteine (Sigma <sup>®</sup> )          | 0.08 g L <sup>-1</sup> | 0.04 g L <sup>-1</sup> | -                     |
| Malt extract (Sigma <sup>®</sup> )        | 0.40 g L <sup>-1</sup> | 0.80 g L <sup>-1</sup> | -                     |
| Casein (Sigma <sup>®</sup> )              | 0.10 g L <sup>-1</sup> | 0.20 g L <sup>-1</sup> | -                     |
| 2,4-D (Sigma <sup>®</sup> )               | 9.06 µM                | -                      | -                     |
| BAP (Sigma <sup>®</sup> )                 | 4.44 µM                | 4.44 µM                | -                     |
| GA <sub>3</sub> (Sigma <sup>®</sup> )     | -                      | -                      | 2.89 µM               |
| Phytigel (Sigma <sup>®</sup> )            | 2.8 g L <sup>-1</sup>  | 2.8 g L <sup>-1</sup>  | 2.8 g L <sup>-1</sup> |
| Activated charcoal (Isofar <sup>®</sup> ) | -                      | 2.0 g L <sup>-1</sup>  | -                     |
| pH                                        | 5.6                    | 5.6                    | 5.6                   |

M1: callus induction and proliferation medium; M2: SE regeneration medium; M3: seedling regeneration medium.
